# Supplementary material for: Development and Validation of Risk Prediction Models for Gestational Diabetes Mellitus Using Four Different Methods
Source: MDPI journal article supplement (doi:10.3390/metabo12111040), 2022-10-29
Supplement: s1 [file s1]

**Supplementary Table S1.** Key words and derivative words

| MeSH terms              | Entry Terms                                                                                                                                                                                                                                                                                                                                                                                                                                                                                                                                                                       |
|-------------------------|-----------------------------------------------------------------------------------------------------------------------------------------------------------------------------------------------------------------------------------------------------------------------------------------------------------------------------------------------------------------------------------------------------------------------------------------------------------------------------------------------------------------------------------------------------------------------------------|
| Diabetes<br>Gestational | Diabetes, Pregnancy-Induced; Diabetes, Pregnancy Induced; Pregnancy-Induced Diabetes; Gestational Diabetes; Diabetes Mellitus, Gestational; Gestational Diabetes Mellitus                                                                                                                                                                                                                                                                                                                                                                                                         |
| Risk factors            | Factor, Risk; Risk Factor; Health Correlates; Correlates, Health; Risk Scores; Risk Score; Score, Risk; Risk Factor Scores; Risk Factor Score; Score, Risk Factor; Population at Risk; Populations at Risk                                                                                                                                                                                                                                                                                                                                                                        |
| Cohort study            | Cohort Study; Studies, Cohort; Study, Cohort; Concurrent Studies; Studies, Concurrent; Concurrent Study; Study, Concurrent; Closed Cohort Studies; Cohort Studies, Closed; Closed Cohort Study; Cohort Study, Closed; Study, Closed Cohort; Studies, Closed Cohort Analysis, Cohort; Cohort Analysis; Analyses, Cohort; Cohort Analyses; Historical Cohort Studies; Cohort Study, Historical; Historical Cohort Study; Study, Historical Cohort; Cohort Studies, Historical; Studies, Historical Cohort; Incidence Studies; Incidence Study; Studies, Incidence; Study, Incidence |

**Supplementary Table S2.** Retrieval strategy

| Website        | Retrieval strategy                                                                                                                                                                                                                                                                                                                                                                                                                                                                                                                                                                                                                                                                                                                                                                                                                                                                                                                                                                                                                                                                                                                                                                                                                                                                                                                                                                                                                                                                                                                                                                                                                                                                                                                                                                                                                                                                                                                                                                                                                                                                                                                                                                                                                                                       | Number of papers |
|----------------|--------------------------------------------------------------------------------------------------------------------------------------------------------------------------------------------------------------------------------------------------------------------------------------------------------------------------------------------------------------------------------------------------------------------------------------------------------------------------------------------------------------------------------------------------------------------------------------------------------------------------------------------------------------------------------------------------------------------------------------------------------------------------------------------------------------------------------------------------------------------------------------------------------------------------------------------------------------------------------------------------------------------------------------------------------------------------------------------------------------------------------------------------------------------------------------------------------------------------------------------------------------------------------------------------------------------------------------------------------------------------------------------------------------------------------------------------------------------------------------------------------------------------------------------------------------------------------------------------------------------------------------------------------------------------------------------------------------------------------------------------------------------------------------------------------------------------------------------------------------------------------------------------------------------------------------------------------------------------------------------------------------------------------------------------------------------------------------------------------------------------------------------------------------------------------------------------------------------------------------------------------------------------|------------------|
| MEDLINE        | <p>(((((Diabetes, Gestational[MeSH Terms]) OR (Diabetes, Pregnancy-Induced[MeSH Terms])) OR (Diabetes, Pregnancy Induced[MeSH Terms])) OR (Pregnancy-Induced Diabetes[MeSH Terms])) OR (Gestational Diabetes[MeSH Terms])) OR (Diabetes Mellitus, Gestational[MeSH Terms])) OR (Gestational Diabetes Mellitus[MeSH Terms])) AND</p> <p>(((((Diabetes, Gestational[MeSH Terms]) OR (Diabetes, Pregnancy-Induced[MeSH Terms])) OR (Diabetes, Pregnancy Induced[MeSH Terms])) OR (Pregnancy-Induced Diabetes[MeSH Terms])) OR (Gestational Diabetes[MeSH Terms])) OR (Diabetes Mellitus, Gestational[MeSH Terms])) OR (Gestational Diabetes Mellitus[MeSH Terms])) AND</p> <p>((((((((((Risk Factors[MeSH Terms]) OR (Factor, Risk[MeSH Terms])) OR (Risk Factor[MeSH Terms])) OR (Health Correlates[MeSH Terms])) OR (Correlates, Health[MeSH Terms])) OR (Risk Scores[MeSH Terms])) OR (Risk Score[MeSH Terms])) OR (Score, Risk[MeSH Terms])) OR (Risk Factor Scores[MeSH Terms])) OR (Risk Factor Score[MeSH Terms])) OR (Score, Risk Factor[MeSH Terms])) OR (Population at Risk[MeSH Terms])) OR (Populations at Risk[MeSH Terms])) AND</p> <p>((((((((((((((((((Cohort Studies[MeSH Terms]) OR (Cohort Study[MeSH Terms])) OR (Studies, Cohort[MeSH Terms])) OR (Study, Cohort[MeSH Terms])) OR (Concurrent Studies[MeSH Terms])) OR (Studies, Concurrent[MeSH Terms])) OR (Concurrent Study[MeSH Terms])) OR (Study, Concurrent[MeSH Terms])) OR (Closed Cohort Studies[MeSH Terms])) OR (Cohort Studies, Closed[MeSH Terms])) OR (Closed Cohort Study[MeSH Terms])) OR (Cohort Study, Closed[MeSH Terms])) OR (Study, Closed Cohort[MeSH Terms])) OR (Studies, Closed Cohort[MeSH Terms])) OR (Studies, Closed Cohort[MeSH Terms])) OR (Cohort Analysis[MeSH Terms])) OR (Analyses, Cohort[MeSH Terms])) OR (Cohort Analyses[MeSH Terms])) OR (Historical Cohort Studies[MeSH Terms])) OR (Cohort Study, Historical[MeSH Terms])) OR (Historical Cohort Study[MeSH Terms])) OR (Study, Historical Cohort[MeSH Terms])) OR (Cohort Studies, Historical[MeSH Terms])) OR (Studies, Historical Cohort[MeSH Terms])) OR (Incidence Studies[MeSH Terms])) OR (Incidence Study[MeSH Terms])) OR (Studies, Incidence[MeSH Terms])) OR (Study, Incidence[MeSH Terms]))</p> | 1650             |
| Web of Science | <p>1 TS=(Diabetes, Gestational OR Diabetes, Pregnancy-Induced OR Diabetes, Pregnancy Induced OR Pregnancy-Induced Diabetes OR Gestational Diabetes OR Diabetes Mellitus, Gestational OR Gestational Diabetes Mellitus)</p> <p>database = WOS, BCI, CSCD, DIIDW, INSPEC, KJD, MEDLINE, RSCI, SCIELO</p> <p>time span = all year</p> <p>retrieval language = automatic</p>                                                                                                                                                                                                                                                                                                                                                                                                                                                                                                                                                                                                                                                                                                                                                                                                                                                                                                                                                                                                                                                                                                                                                                                                                                                                                                                                                                                                                                                                                                                                                                                                                                                                                                                                                                                                                                                                                                 | 40187            |
|                | <p>2 TS=(Risk Factors OR Factor, Risk OR Risk Factor OR Health Correlates OR Correlates, Health OR Risk Scores OR Risk Score OR Score, Risk OR Risk Factor Scores</p>                                                                                                                                                                                                                                                                                                                                                                                                                                                                                                                                                                                                                                                                                                                                                                                                                                                                                                                                                                                                                                                                                                                                                                                                                                                                                                                                                                                                                                                                                                                                                                                                                                                                                                                                                                                                                                                                                                                                                                                                                                                                                                    | 2895742          |

|        |                                                                                                                                                                                                                                                                                                                                                                                                                                                                                                                                                                                                                                                                                                                                                                                                                                                                                                                                                                                                                                                                                                                                                                                                                                                                                                                                                                                                                                                                                                                                      |         |
|--------|--------------------------------------------------------------------------------------------------------------------------------------------------------------------------------------------------------------------------------------------------------------------------------------------------------------------------------------------------------------------------------------------------------------------------------------------------------------------------------------------------------------------------------------------------------------------------------------------------------------------------------------------------------------------------------------------------------------------------------------------------------------------------------------------------------------------------------------------------------------------------------------------------------------------------------------------------------------------------------------------------------------------------------------------------------------------------------------------------------------------------------------------------------------------------------------------------------------------------------------------------------------------------------------------------------------------------------------------------------------------------------------------------------------------------------------------------------------------------------------------------------------------------------------|---------|
|        | OR Risk Factor Score OR Score, Risk Factor OR Population at Risk OR Populations at Risk)                                                                                                                                                                                                                                                                                                                                                                                                                                                                                                                                                                                                                                                                                                                                                                                                                                                                                                                                                                                                                                                                                                                                                                                                                                                                                                                                                                                                                                             |         |
|        | database = WOS, BCI, CSCD, DIIDW, INSPEC, KJD, MEDLINE, RSCI, SCIELO<br>time span = all year<br><br>retrieval language = automatic                                                                                                                                                                                                                                                                                                                                                                                                                                                                                                                                                                                                                                                                                                                                                                                                                                                                                                                                                                                                                                                                                                                                                                                                                                                                                                                                                                                                   |         |
| 3      | TS=(Cohort Studies OR Cohort Study OR Studies, Cohort OR Study, Cohort OR Concurrent Studies OR Studies, Concurrent OR Concurrent Study OR Study, Concurrent OR Closed Cohort Studies OR Cohort Studies, Closed OR Closed Cohort Study OR Cohort Study, Closed OR Study, Closed Cohort OR Studies, Closed Cohort OR Analysis, Cohort OR Cohort Analysis OR Analyses, Cohort OR Cohort Analyses OR Historical Cohort Studies OR Cohort Study, Historical OR Historical Cohort Study OR Study, Historical Cohort OR Cohort Studies, Historical OR Studies, Historical Cohort OR Incidence Studies OR Incidence Study OR Studies, Incidence OR Study, Incidence)                                                                                                                                                                                                                                                                                                                                                                                                                                                                                                                                                                                                                                                                                                                                                                                                                                                                        | 1929117 |
|        | database = WOS, BCI, CSCD, DIIDW, INSPEC, KJD, MEDLINE, RSCI, SCIELO<br>time span = all year<br><br>retrieval language = automatic                                                                                                                                                                                                                                                                                                                                                                                                                                                                                                                                                                                                                                                                                                                                                                                                                                                                                                                                                                                                                                                                                                                                                                                                                                                                                                                                                                                                   |         |
| 4      | #3 AND #2 AND #1                                                                                                                                                                                                                                                                                                                                                                                                                                                                                                                                                                                                                                                                                                                                                                                                                                                                                                                                                                                                                                                                                                                                                                                                                                                                                                                                                                                                                                                                                                                     | 5085    |
|        | database = WOS, BCI, CSCD, DIIDW, INSPEC, KJD, MEDLINE, RSCI, SCIELO<br>time span = all year<br><br>retrieval language = automatic                                                                                                                                                                                                                                                                                                                                                                                                                                                                                                                                                                                                                                                                                                                                                                                                                                                                                                                                                                                                                                                                                                                                                                                                                                                                                                                                                                                                   |         |
| Embase | ('diabetes, gestational'/exp OR 'diabetes, gestational' OR 'diabetes, pregnancy-induced' OR 'diabetes, pregnancy induced' OR 'pregnancy-induced diabetes' OR 'gestational diabetes'/exp OR 'gestational diabetes' OR 'diabetes mellitus, gestational' OR 'gestational diabetes mellitus'/exp OR 'gestational diabetes mellitus') AND ('risk factors'/exp OR 'risk factors' OR 'factor, risk' OR 'risk factor'/exp OR 'risk factor' OR 'health correlates' OR 'correlates, health' OR 'risk scores' OR 'risk score'/exp OR 'risk score' OR 'score, risk' OR 'risk factor scores' OR 'risk factor score' OR 'score, risk factor' OR 'population at risk'/exp OR 'population at risk' OR 'populations at risk') AND ('cohort studies'/exp OR 'cohort studies' OR 'cohort study'/exp OR 'cohort study' OR 'studies, cohort' OR 'study, cohort' OR 'concurrent studies' OR 'studies, concurrent' OR 'concurrent study' OR 'study, concurrent' OR 'closed cohort studies' OR 'cohort studies, closed' OR 'closed cohort study' OR 'cohort study, closed' OR 'study, closed cohort' OR 'studies, closed cohort' OR 'analysis, cohort'/exp OR 'analysis, cohort' OR 'cohort analysis'/exp OR 'cohort analysis' OR 'analyses, cohort' OR 'cohort analyses' OR 'historical cohort studies' OR 'cohort study, historical' OR 'historical cohort study' OR 'study, historical cohort' OR 'cohort studies, historical' OR 'studies, historical cohort' OR 'incidence studies' OR 'incidence study' OR 'studies, incidence' OR 'study, incidence') | 2202    |

|       |      |
|-------|------|
| Total | 8937 |
|-------|------|

**Supplementary Table S3.** Baseline characteristics of the included studies

| First<br>Author/Year/Country or<br>region(continent) | Source of cohort                                                                                             | Study design and<br>period    | Sample<br>size | Risk factors for<br>GDM development               |
|------------------------------------------------------|--------------------------------------------------------------------------------------------------------------|-------------------------------|----------------|---------------------------------------------------|
| Qi 2020 <sup>1</sup>                                 | Cohort of pregnant women<br>(Sichuan, China)                                                                 | Retrospective 2013 -<br>2014  | 8356           | GWG at the 1 <sup>st</sup><br>trimester           |
| Hedderson 2010 <sup>2</sup>                          | Cohort of kaiser<br>permanente(Northern California,<br>USA)                                                  | Retrospective 1996-<br>1998   | 1145           | GWG at the 1 <sup>st</sup><br>trimester           |
| Zhong 2017 <sup>3</sup>                              | Cohort of mother-infant<br>pairs[Wuhan, China( TMCHC<br>study)]                                              | Prospective 2013 -<br>2016    | 2090           | GWG at the 1st<br>trimester                       |
| Chen 2015 <sup>4</sup>                               | Nurses' Health Study II (USA)                                                                                | Prospective, 1989 -<br>2001   | 27482          | Age at menarche                                   |
| Dishi 2011 <sup>5</sup>                              | Omega study (Sweden)                                                                                         | Prospective, 1996 -<br>2008   | 3490           | Age at menarche                                   |
| Li 2016 <sup>6</sup>                                 | HBC Study (Wuhan, China)                                                                                     | Prospective, 2012 -<br>2014   | 6900           | Age at menarche                                   |
| Shen 2016 <sup>7</sup>                               | NHANES Study (USA.)                                                                                          | Retrospective, 2007-<br>2012  | 5914           | Age at menarche                                   |
| Hao 2016 <sup>8</sup>                                | Cohort of pregnant women<br>(Shanghai, China)                                                                | Prospective, 2012 -<br>2014   | 7084           | Thyroid Diseases                                  |
| Li 2020 <sup>9</sup>                                 | Women and Children's Health<br>Care Center System (Qingdao,<br>China)                                        | Retrospective, 2018 -<br>2019 | 17145          | Thyroid Diseases,<br>gestational age, pre-<br>BMI |
| Mannisto 2013 <sup>10</sup>                          | Consortium on Safe Labor (USA)                                                                               | Retrospective, 2002 -<br>2008 | 223512         | Thyroid Diseases                                  |
| Yang 2016 <sup>11</sup>                              | Cohort of pregnant women<br>(Shanghai, China)                                                                | Retrospective, 2013 -<br>2015 | 27513          | Thyroid Diseases                                  |
| Lei 2019 <sup>12</sup>                               | Cohort of pregnant women<br>(Beijing, China)                                                                 | Retrospective, 2013 -<br>2015 | 9024           | ART                                               |
| Barua 2016 <sup>13</sup>                             | Cohort of pregnant women<br>(western Sydney, Australia)                                                      | Retrospective, 2007 -<br>2010 | 50375          | ART                                               |
| Hu 2019 <sup>14</sup>                                | Cohort of pregnant women<br>(Shanghai, China)                                                                | Retrospective, 2014 -<br>2017 | 1022           | ART                                               |
| Nagata 2019 <sup>15</sup>                            | Japan environment and children's<br>study (Japan)                                                            | Retrospective, 2011 -<br>2014 | 97592          | ART                                               |
| Shevell 2005 <sup>16</sup>                           | The first and second trimester<br>evaluation of risk trial (a<br>international multicenter<br>investigation) | Prospective, 1999 -<br>2002   | 36062          | ART                                               |

|                                        |                                                                       |                            |        |                                      |
|----------------------------------------|-----------------------------------------------------------------------|----------------------------|--------|--------------------------------------|
| Silberstein 2013 <sup>17</sup>         | Cohort of pregnant women (Israel)                                     | Retrospective, 1998 - 2006 | 174781 | ART                                  |
| Stern 2014 <sup>18</sup>               | Cohort of pregnant women (Massachusetts, USA)                         | Retrospective, 2004 - 2008 | 305774 | ART                                  |
| Wang 2013 <sup>19</sup>                | Cohort of pregnant women (Australia)                                  | Retrospective, 2007 - 2009 | 400392 | ART                                  |
| Cosson 2013 <sup>20</sup>              | Cohort of pregnant women (an international multicenter investigation) | Prospective, 2002 - 2010   | 17344  | T2DM family history                  |
| Schoenaker 2018 <sup>21</sup>          | Australian Longitudinal Study on Women's Health (Australia)           | Prospective, 1996 - 2015   | 6504   | T2DM family history                  |
| Hossein 2018 <sup>22</sup>             | Cohort of pregnant women (Iran)                                       | Prospective, 2015 - 2017   | 929    | T2DM family history                  |
| Larrabure-Torrealva 2018 <sup>23</sup> | Cohort of pregnant women (Peru)                                       | Retrospective, 2013 - 2014 | 1300   | T2DM family history                  |
| Leng 2014 <sup>24</sup>                | Cohort of pregnant women (Tianjin, China)                             | Retrospective, 2010 - 2012 | 17808  | T2DM family history                  |
| Pirjani 2016 <sup>25</sup>             | Cohort of pregnant women (Iran)                                       | Prospective, 2012 - 2013   | 256    | T2DM family history, pre-BMI         |
| Schaefer 2018 <sup>26</sup>            | Cohort of pregnant women (Guangzhou, China)                           | Prospective, 2012 - 2015   | 8381   | T2DM family history                  |
| Shahbazian 2016 <sup>27</sup>          | Cohort of pregnant women (Iran)                                       | Prospective, 2014 - 2015   | 750    | T2DM family history                  |
| Wang 2019 <sup>28</sup>                | Cohort of pregnant women (Sichuan, China)                             | Retrospective, 2016 - 2018 | 3608   | T2DM family history, gestational age |
| Yan 2016 <sup>29</sup>                 | Cohort of pregnant women (Xiamen, China)                              | Retrospective, 2011 - 2018 | 78572  | T2DM family history                  |
| Khaili 2013 <sup>30</sup>              | Cohort of pregnant women (UK)                                         | Retrospective              | 76161  | Maternal age                         |
| Londero 2019 <sup>31</sup>             | Cohort of pregnant women (Italy)                                      | Retrospective, 2001 - 2014 | 22933  | Gestational age                      |
| Sweeting 2017 <sup>32</sup>            | Cohort of pregnant women (Sydney, Australia)                          | Retrospective, 2011 - 2013 | 980    | Gestational age, pre-BMI             |
| Wang 2017 <sup>33</sup>                | Cohort of pregnant women (Beijing, China)                             | Retrospective, 2013        | 14970  | Gestational age                      |
| Koo 2011 <sup>34</sup>                 | Cohort of pregnant women (Korea)                                      | Retrospective, 2005 - 2008 | 29760  | Gestational age                      |
| Sun 2020 <sup>35</sup>                 | CPWCS-PUMC cohort study (Beijing, China)                              | Retrospective, 2017 - 2018 | 3172   | pre-BMI                              |
| Rodríguez-Mesa 2019 <sup>36</sup>      | Cohort of pregnant women (Spain)                                      | Retrospective, 2014 - 2015 | 710    | pre-BMI                              |
| Shaukat 2019 <sup>37</sup>             | PHCC Database (an international multicenter investigation)            | Retrospective, 2016 - 2017 | 1134   | pre-BMI                              |

|                                   |                                               |                               |      |         |
|-----------------------------------|-----------------------------------------------|-------------------------------|------|---------|
| Gao 2017 <sup>38</sup>            | Cohort of pregnant women<br>(Changsha, China) | Retrospective, 2015           | 919  | pre-BMI |
| Laine 2017 <sup>39</sup>          | Cohort of pregnant women<br>(Vantaa, Finland) | Retrospective, 2009 -<br>2015 | 7750 | pre-BMI |
| Yong 2020 <sup>40</sup>           | Cohort of pregnant women<br>(Malaysia)        | Retrospective, 2010 -<br>2012 | 1951 | pre-BMI |
| Hashemi-Nazari 2018 <sup>41</sup> | Cohort of pregnant women (Iran)               | Retrospective, 2015 -<br>2016 | 1009 | pre-BMI |
| Shao 2020 <sup>42</sup>           | Cohort of pregnant women<br>(Zhoushan, China) | Retrospective, 2011-<br>2018  | 3318 | pre-BMI |

**Supplementary Table S4.** Newcastle-Ottawa Quality Assessment Scale for the 42 cohort studies

| Study<br>(First author/year) | Selection                                |                           |                                       |                           |                                                                          | Comparability | Outcome               |                                                     |                                  | Total scores |
|------------------------------|------------------------------------------|---------------------------|---------------------------------------|---------------------------|--------------------------------------------------------------------------|---------------|-----------------------|-----------------------------------------------------|----------------------------------|--------------|
|                              | Representativeness of the exposed cohort | of the non-exposed cohort | Selectivity of the non-exposed cohort | Ascertainment of exposure | Demonstration that outcome of interest was not present at start of study |               | Assessment of outcome | Was the follow-up long enough for outcomes to occur | Adequacy of follow-up of cohorts |              |
| Qi 2020                      | ★                                        |                           | ★                                     |                           | ★                                                                        | ★★            | ★                     | ★                                                   | ★                                | 9            |
| Hedderson 2010               | ★                                        |                           | ★                                     |                           | ★                                                                        | ★★            | ★                     | ★                                                   |                                  | 8            |
| Zhong 2017                   | ★                                        |                           | ★                                     |                           | ★                                                                        | ★★            | ★                     | ★                                                   |                                  | 8            |
| Chen 2015                    | ★                                        |                           | ★                                     |                           | ★                                                                        | ★             | ★                     | ★                                                   |                                  | 7            |
| Dishi 2011                   | ★                                        |                           | ★                                     |                           | ★                                                                        | ★             | ★                     | ★                                                   |                                  | 7            |
| Li 2016                      | ★                                        |                           | ★                                     |                           | ★                                                                        | ★             | ★                     | ★                                                   |                                  | 7            |
| Shen 2016                    | ★                                        |                           | ★                                     |                           | ★                                                                        | ★★            | ★                     | ★                                                   |                                  | 8            |
| Hao 2016                     | ★                                        |                           | ★                                     |                           | ★                                                                        | ★★            | ★                     | ★                                                   | ★                                | 9            |
| Li 2020                      | ★                                        |                           | ★                                     |                           | ★                                                                        | ★★            | ★                     | ★                                                   |                                  | 8            |
| Mannisto 2013                | ★                                        |                           | ★                                     |                           | ★                                                                        | ★★            | ★                     | ★                                                   |                                  | 8            |
| Yang 2016                    | ★                                        |                           | ★                                     |                           | ★                                                                        | ★★            | ★                     | ★                                                   | ★                                | 9            |
| Lei 2019                     | ★                                        |                           | ★                                     |                           | ★                                                                        | ★             | ★                     | ★                                                   |                                  | 7            |
| Silberstein 2013             | ★                                        |                           | ★                                     |                           | ★                                                                        | ★             | ★                     | ★                                                   |                                  | 7            |
| Stern 2014                   | ★                                        |                           | ★                                     |                           | ★                                                                        | ★             | ★                     | ★                                                   | ★                                | 8            |
| Wang 2013                    | ★                                        |                           | ★                                     |                           | ★                                                                        | ★★            | ★                     | ★                                                   | ★                                | 9            |



|                 |   |   |   |   |    |   |   |   |   |
|-----------------|---|---|---|---|----|---|---|---|---|
| Barua 2016      | ★ | ★ | ★ | ★ | ★  | ★ | ★ | ★ | 8 |
| Hu 2019         | ★ | ★ | ★ | ★ | ★  | ★ | ★ |   | 7 |
| Nagata 2019     | ★ | ★ | ★ | ★ | ★★ | ★ | ★ | ★ | 9 |
| Shevell 2005    | ★ | ★ | ★ | ★ | ★★ | ★ | ★ | ★ | 9 |
| Khaili 2013     | ★ | ★ | ★ | ★ | ★  | ★ | ★ | ★ | 8 |
| Londero 2019    | ★ | ★ | ★ | ★ | ★★ | ★ | ★ | ★ | 9 |
| Sweeting 2017   | ★ | ★ | ★ | ★ | ★★ | ★ | ★ | ★ | 9 |
| Wang 2017       | ★ | ★ | ★ | ★ | ★★ | ★ | ★ | ★ | 9 |
| Koo 2011        | ★ | ★ | ★ | ★ | ★  | ★ | ★ | ★ | 8 |
| Wang 2019       | ★ | ★ | ★ | ★ | ★★ | ★ | ★ | ★ | 9 |
| Leng 2014       | ★ | ★ | ★ | ★ | ★★ | ★ | ★ | ★ | 9 |
| Schoenaker 2018 | ★ | ★ | ★ | ★ | ★★ | ★ | ★ | ★ | 9 |
| Schaefer 2018   | ★ | ★ | ★ | ★ | ★  | ★ | ★ | ★ | 8 |
| Shahbazian 2016 | ★ | ★ | ★ | ★ | ★  | ★ | ★ |   | 7 |
| Pirjani 2016    | ★ | ★ | ★ | ★ | ★  | ★ | ★ | ★ | 8 |
| Cosson 2013     | ★ | ★ | ★ | ★ | ★★ | ★ | ★ | ★ | 9 |
| Hosseini 2018   | ★ | ★ | ★ | ★ | ★★ | ★ | ★ | ★ | 9 |

|                         |   |   |   |   |    |   |   |   |   |
|-------------------------|---|---|---|---|----|---|---|---|---|
| Larrabure-Torrealva2018 | ★ | ★ | ★ | ★ | ★★ | ★ | ★ | ★ | 9 |
| Yan 2016                | ★ | ★ | ★ | ★ | ★  | ★ | ★ | ★ | 8 |
| Sun 2020                | ★ | ★ | ★ | ★ | ★★ | ★ | ★ |   | 8 |
| Rodríguez-Mesa 2019     | ★ | ★ | ★ | ★ | ★  | ★ | ★ |   | 7 |
| Gao 2017                | ★ | ★ | ★ | ★ | ★  | ★ | ★ | ★ | 8 |
| Laine 2017              | ★ | ★ | ★ | ★ | ★  | ★ | ★ |   | 7 |
| Shaukat 2019            | ★ | ★ | ★ | ★ | ★★ | ★ | ★ |   | 8 |
| Yong 2020               | ★ | ★ | ★ | ★ | ★★ | ★ | ★ |   | 8 |
| Hashemi-Nazari 2018     | ★ | ★ | ★ | ★ | ★  | ★ | ★ |   | 7 |
| Shao 2020               | ★ | ★ | ★ | ★ | ★★ | ★ | ★ |   | 8 |

**Supplementary Table S5.** Seven risk factors included in the systematic review and meta-analysis

| Risk factors                    | First author/Year | Sample size | Definition of risk factor                                                                                                                  | OR   | 95%CI       | P value |
|---------------------------------|-------------------|-------------|--------------------------------------------------------------------------------------------------------------------------------------------|------|-------------|---------|
| GWG at the 1st trimester        | Qi 2020           | 632         | Above IOM recommended GWG at the 1st trimester                                                                                             | 1.07 | 0.94 - 1.21 | >0.05   |
| GWG at the 1st trimester        | Hedderson 2010    | 245         | Above IOM recommended GWG at the 1st trimester                                                                                             | 1.53 | 1.09 - 2.15 | <0.05   |
| GWG at the 1st trimester        | Zhong 2017        | 921         | Above IOM recommended GWG at the 1st trimester                                                                                             | 0.59 | 0.33 - 1.15 | >0.05   |
| Thyroid relative antibodies (+) | Hao 2016          | 281         | TSH(H)TgAb(+)                                                                                                                              | 1.44 | 1.14 - 1.84 | <0.05   |
| Thyroid relative antibodies (+) | Hao 2016          | 648         | TSH(N)TPOAb(+)                                                                                                                             | 1.65 | 1.43 - 1.92 | <0.05   |
| Thyroid relative antibodies (+) | Hao 2016          | 78          | TSH(H)TPOAb(+)                                                                                                                             | 3.38 | 2.63 - 3.45 | <0.05   |
| Thyroid relative antibodies (+) | Li 2020           | 578         | TSH 0.1 - 2.5 mIU/L at the 1 <sup>st</sup> trimester or 0.2 - 3.0 mIU/L, TgAb/TPOAb(+) at the 2 <sup>nd</sup> or 3 <sup>rd</sup> trimester | 1.47 | 1.11 - 1.96 | < 0.05  |
| Thyroid relative antibodies (+) | Mannisto 2013     | 3183        | TgAb(+)                                                                                                                                    | 1.57 | 1.33 - 1.86 | < 0.05  |
| Thyroid relative antibodies (+) | Yang 2016         | 393         | TPOAb(+)                                                                                                                                   | 1.10 | 0.98 - 1.23 | 0.118   |
| Age at menarche                 | Chen 2015         | 8730        | Age at menarche ≤11 yr                                                                                                                     | 1.34 | 1.14 - 1.58 | < 0.05  |
| Age at menarche                 | Dishi 2011        | 505         | Age at menarche ≤11 yr                                                                                                                     | 0.82 | 0.51 - 1.32 | > 0.05  |
| Age at menarche                 | Li 2016           | 379         | Age at menarche ≤11 yr                                                                                                                     | 1.41 | 1.06 - 1.87 | < 0.05  |
| Age at menarche                 | Shen 2016         | 115         | Age at menarche                                                                                                                            | 1.75 | 1.10-2.79   | < 0.05  |

|                     |                          |       | ≤11 yr                                      |       |             |         |
|---------------------|--------------------------|-------|---------------------------------------------|-------|-------------|---------|
| ART                 | Lei 2019                 | 2256  | IVF+ICSI                                    | 1.85  | 1.24 - 2.78 | < 0.01  |
| ART                 | Barua 2016               | 1721  | IVF ICSI IUI OI                             | 1.509 | 1.30 - 1.75 | < 0.001 |
| ART                 | Hu 2019                  | 237   | ICSI                                        | 0.859 | 0.59 - 1.25 | 0.859   |
| ART                 | Hu 2019                  | 353   | Secondary infertility                       | 1.187 | 0.85 - 1.65 | 0.311   |
| ART                 | Hu 2019                  | 358   | Fresh cycles                                | 1.382 | 1.01 - 1.90 | 0.046   |
| ART                 | Nagata 2019              | 3939  | ovulation induction                         | 0.97  | 0.8 - 1.19  | > 0.05  |
| ART                 | Nagata 2019              | 1476  | IVT-ET                                      | 0.99  | 0.75 - 1.31 | > 0.05  |
| ART                 | Nagata 2019              | 1671  | ICSI                                        | 0.97  | 0.74 - 1.27 | > 0.05  |
| ART                 | Shevell 2005             | 1222  | Ovulation Induction                         | 1.5   | 1.1 - 2.20  | 0.01    |
| ART                 | Shevell 2005             | 554   | IVF                                         | 0.5   | 0.2 - 1.0o  | 0.06    |
| ART                 | Silberstein 2013         | 1294  | IVF                                         | 1.77  | 1.52 - 2.07 | < 0.001 |
| ART                 | Stern 2014               | 1901  | male factor                                 | 1.15  | 0.96 - 1.38 | > 0.05  |
| ART                 | Stern 2014               | 406   | endometriosis                               | 0.93  | 0.62 - 1.39 | > 0.05  |
| ART                 | Stern 2014               | 676   | ovulation disorders                         | 2.17  | 1.72 - 2.73 | < 0.05  |
| ART                 | Stern 2014               | 706   | tubal                                       | 1.42  | 1.09 - 1.84 | < 0.05  |
| ART                 | Wang 2013                | 13732 | IVF, ICSI or gamete intrafallopian transfer | 1.26  | 1.18 - 1.36 | < 0.05  |
|                     |                          |       |                                             |       |             |         |
| T2DM family history | Cosson 2013              | 3588  | T2DM family history                         | 1.14  | 1.03 - 1.27 | < 0.05  |
| T2DM family history | Schoenaker 2018          | 544   | T2DM family history                         | 1.53  | 0.79 - 2.95 | > 0.05  |
| T2DM family history | Hossein 2018             | 56    | Early onset                                 | 3.10  | 1.90 - 5.20 | < 0.05  |
| T2DM family history | Hossein 2018             | 34    | Late onset                                  | 2.20  | 1.20 - 3.90 | < 0.05  |
| T2DM family history | Larrabure-Torrealva 2018 | 466   | T2DM family history                         | 1.51  | 1.1 - 2.07  | < 0.05  |
| T2DM family history | Leng 2014                | 191   | T2DM family history                         | 1.61  | 1.36 - 1.91 | < 0.05  |
| T2DM family history | Pirjani 2016             | 91    | T2DM family history                         | 2.01  | 1.13 - 3.56 | 0.016   |
| T2DM family history | Schaefer 2018            | 842   | T2DM family history                         | 1.51  | 1.25 - 1.82 | < 0.05  |
| T2DM family history | Shahbazian 2016          | 87    | T2DM family history                         | 2.47  | 1.33 - 4.59 | < 0.05  |
| T2DM family history | Wang 2019                | 299   | T2DM family history                         | 2.52  | 1.94 - 3.27 | < 0.05  |

|                     |                     |           |                        |      |             |         |
|---------------------|---------------------|-----------|------------------------|------|-------------|---------|
| T2DM family history | Yan 2016            | 1825      | T2DM family history    | 1.97 | 1.78 - 2.19 | < 0.001 |
| Maternal age        | Khaili 2013         | 35 - 39   | 16325                  | 1.62 | 1.43 - 1.83 | < 0.05  |
| Maternal age        | Khaili 2013         | ≥ 40      | 4061                   | 1.88 | 1.55 - 2.29 | < 0.05  |
| Maternal age        | Londero 2019        | ≥ 40      | 1552                   | 1.71 | 1.37 - 2.12 | < 0.05  |
| Maternal age        | Sweeting 2017       | 322       | 30 - 34                | 1.18 | 0.80 - 1.76 | > 0.05  |
| Maternal age        | Sweeting 2017       | 404       | ≥ 35                   | 1.49 | 1.03 - 2.16 | < 0.05  |
| Maternal age        | Wang 2017           | 4365      | 30-34                  | 1.51 | 1.37 - 1.66 | < 0.05  |
| Maternal age        | Wang 2017           | 1017      | 35-40                  | 2.09 | 1.79 - 2.46 | < 0.05  |
| Maternal age        | Wang 2017           | 155       | ≥40                    | 2.17 | 1.49 - 3.17 | < 0.05  |
| Maternal age        | Li 2020             | 5893      | 30-40                  | 1.24 | 1.05 - 1.49 | < 0.05  |
| Maternal age        | Li 2020             | 3207      | ≥35                    | 2.18 | 1.84 - 2.59 | < 0.05  |
| Maternal age        | Koo 2011            | 15496     | 30-34                  | 2.00 | 1.60 - 2.60 | < 0.001 |
| Maternal age        | Koo 2011            | 5665      | 35 - 39                | 3.60 | 2.80 - 4.80 | < 0.001 |
| Maternal age        | Koo 2011            | 649       | > 40                   | 5.10 | 3.30 - 7.80 | < 0.001 |
| Maternal age        | Wang 2019           | 1606      | 30 - 34                | 1.88 | 1.54 - 2.30 | < 0.05  |
| Maternal age        | Wang 2019           | 527       | ≥35                    | 2.88 | 2.24 - 3.71 | < 0.05  |
| pre-BMI             | Sun 2020            | 401       | overweight             | 2.01 | 1.47 - 2.71 | < 0.001 |
| pre-BMI             | Sun 2020            | 59        | obese                  | 1.91 | 0.94 - 3.91 | 0.075   |
| pre-BMI             | Rodríguez-Mesa 2019 | 109       | obese                  | 3.61 | 2.10 - 6.20 | < 0.001 |
| pre-BMI             | Shaukat 2019        | 240       | overweight (non-Arabs) | 1.23 | 0.76 - 2.00 | > 0.05  |
| pre-BMI             | Shaukat 2019        | 159       | overweight (Arabs)     | 1.24 | 0.84 - 1.82 | > 0.05  |
| pre-BMI             | Shaukat 2019        | 114       | obese (Arabs)          | 2.38 | 1.51 - 3.84 | < 0.05  |
| pre-BMI             | Shaukat 2019        | 116       | obese(non-Arabs)       | 1.60 | 0.97 - 2.65 | > 0.05  |
| pre-BMI             | Gao 2017            | 141       | overweight and obese   | 2.19 | 1.02 - 4.76 | < 0.05  |
| pre-BMI             | Laine 2017          | 758       | obese                  | 5.36 | 4.53 - 6.36 | < 0.05  |
| pre-BMI             | Yong 2020           | 848       | overweight and obese   | 1.44 | 1.04 - 1.81 | < 0.05  |
| pre-BMI             | Hashemi-Nazari 2018 | Not given | overweight             | 1.53 | 0.96 - 2.43 | 0.05    |
| pre-BMI             | Hashemi-Nazari 2018 | Not given | obese                  | 2.19 | 1.30 - 3.68 | 0.003   |
| pre-BMI             | Shao 2020           | 342       | overweight             | 1.85 | 1.41 - 2.43 | < 0.001 |
| pre-BMI             | Shao 2020           | 70        | obese                  | 1.91 | 1.12 - 3.27 | < 0.05  |
| pre-BMI             | Li 2020             | 2980      | overweight             | 1.63 | 1.26 - 2.11 | < 0.05  |
| pre-BMI             | Li 2020             | 611       | obese                  | 1.3  | 0.75 - 2.26 | < 0.05  |
| pre-BMI             | Sweeting 2017       | 255       | obese                  | 1.2  | 0.85 - 1.70 | > 0.05  |
| pre-BMI             | Pirjani 2016        | Not given | overweight             | 1.01 | 0.54 - 1.92 | > 0.05  |
| pre-BMI             | Pirjani 2016        | 40        | obese                  | 2.74 | 1.28 - 5.8  | < 0.05  |

**Supplementary Table S6.** The clinical characteristics of pregnant women in the GDM and NGT groups at the 1<sup>st</sup> trimester

| Variables                                                        | NGT                | GDM               | P value |
|------------------------------------------------------------------|--------------------|-------------------|---------|
| Number                                                           | 723                | 352               | -       |
| Maternal age                                                     | 30.83 ± 0.41       | 31.13 ± 0.57      | 0.017   |
| T2DM family history                                              | 46 (6.4)           | 57 (16.2)         | < 0.001 |
| pre-BMI                                                          | 21.02 ± 0.28       | 22.89 ± 0.40      | 0.009   |
| Age at menarche ≤ 11 yr                                          | 36 (5.0)           | 48 (13.6)         | < 0.001 |
| ART                                                              | 22 (3.0)           | 62 (17.6)         | < 0.001 |
| Thyroid antibodies (+)<br>[TPOAb/TgAb]                           | 45 (6.2)           | 123 (34.9)        | < 0.001 |
| Above IOM<br>recommended GWG at<br>the 1 <sup>st</sup> trimester | 73 (10.1)          | 118 (33.5)        | < 0.001 |
| History of macrosomia                                            | 15 (2.1)           | 24 (6.8)          | < 0.001 |
| Parity                                                           | 1.47 ± 0.05        | 1.51 ± 0.08       | 0.841   |
| FBG (mmol/L)                                                     | 4.93 ± 0.33        | 5.06 ± 0.34       | < 0.05  |
| Vitamin B12 (pg/mL)                                              | 64.51 ± 16.01      | 64.60 ± 18.92     | 0.171   |
| Ferritin (ng/mL)                                                 | 46.58 ± 4.17       | 48.11 ± 3.54      | 0.210   |
| Total protein (g/L)                                              | 69.85 ± 0.50       | 69.44 ± 0.50      | 0.793   |
| Albumin (g/L)                                                    | 40.71 ± 0.25       | 40.05 ± 0.39      | 0.125   |
| Globulin (g/L)                                                   | 29.15 ± 0.42       | 28.39 ± 0.37      | 0.060   |
| ALT(U/L)                                                         | 17.53 ± 1.38       | 17.95 ± 2.01      | 0.105   |
| AST(U/L)                                                         | 18.92 ± 0.82       | 18.25 ± 1.10      | 0.121   |
| CHO (mmol/L)                                                     | 4.16 (3.12 – 5.35) | 4.21(3.38 – 5.72) | 0.715   |
| TG (mmol/L)                                                      | 1.47 ± 0.07        | 1.51 ± 0.88       | 0.977   |
| HDL-C (mmol/L)                                                   | 1.65 ± 0.04        | 1.61 ± 0.05       | 0.268   |
| LDL-C (mmol/L)                                                   | 2.32 ± 0.06        | 2.36 ± 0.08       | 0.900   |

**Note.** Data were presented as n (%), mean (SD, standard deviation). \* One-way ANOVA was used for continuous variables showing normal distribution, and the Chi-square test (or Fisher's Exact test) was used for categorical variables. GDM, gestational diabetes mellitus; NGT, normal glucose tolerance; pre-BMI, pre-pregnancy body mass index; ART, assisted reproductive technology; TPOAb, thyroid peroxidase antibody; TGAAb, anti-thyroglobulin antibody; FBG: fasting blood glucose; ALT, alanine aminotransferase; AST, aspartate aminotransferase; CHO, total cholesterol; TG, triglyceride; HDL-C, high density lipoprotein cholesterol; LDL-C: low density lipoprotein cholesterol.

**Supplementary Table S7.** Performance of the GDM risk prediction model at different cut-off values

| Cut-off value | Sensitivity | Specificity | Youden index |
|---------------|-------------|-------------|--------------|
| 1             | 0.949       | 0.314       | 0.263        |
| 2.5           | 0.903       | 0.336       | 0.239        |
| 3.5           | 0.903       | 0.342       | 0.245        |
| 4.5           | 0.855       | 0.375       | 0.23         |
| 5.5           | 0.736       | 0.674       | 0.41         |
| 6.5           | 0.733       | 0.696       | 0.429        |
| 7.5           | 0.653       | 0.737       | 0.39         |
| 8.5           | 0.628       | 0.817       | 0.445        |
| 9.5           | 0.585       | 0.881       | 0.466        |
| 10.5          | 0.474       | 0.899       | 0.373        |
| 11.5          | 0.418       | 0.923       | 0.341        |
| 12.5          | 0.324       | 0.943       | 0.267        |
| 13.5          | 0.264       | 0.957       | 0.221        |
| 14.5          | 0.23        | 0.97        | 0.2          |
| 15.5          | 0.173       | 0.978       | 0.151        |
| 16.5          | 0.145       | 0.986       | 0.131        |
| 17.5          | 0.114       | 0.989       | 0.103        |
| 18.5          | 0.08        | 0.993       | 0.073        |
| 19.5          | 0.057       | 0.994       | 0.051        |
| 20.5          | 0.045       | 0.997       | 0.042        |
| 21.5          | 0.034       | 0.999       | 0.033        |
| 22.5          | 0.028       | 1           | 0.028        |
| 23.5          | 0.014       | 1           | 0.014        |
| 25            | 0.011       | 1           | 0.011        |
| 26.5          | 0.009       | 1           | 0.009        |
| 27.5          | 0.003       | 1           | 0.003        |
| 29            | 0           | 1           | 0            |

**Supplementary Table S8.** The comparison of the score-scaled GDM prediction model and logistic regression analysis of the GDM prediction model

| Variables         | NRI   | <i>P</i> | IDI   | <i>P</i> |
|-------------------|-------|----------|-------|----------|
| model 1 - model 2 | 0.208 | < 0.001  | 0.045 | < 0.001  |

Model 1, the score scaled GDM risk prediction model; model 2, the logistic regression analysis of GDM risk prediction model. The test was conducted by Z test. A *P* value < 0.05 is considered a significant.



**Supplementary Table S9.** The comparison of the two ML models.

| Models        | AUC<br>(training set) | AUC<br>(validation set) | Precision | Recall | Fi-score | Accuracy | Specificity |
|---------------|-----------------------|-------------------------|-----------|--------|----------|----------|-------------|
| Decision Tree | 0.825                 | 0.816                   | 0.799     | 0.709  | 0.751    | 76.8%    | 0.825       |
| Random Forest | 0.823                 | 0.827                   | 0.768     | 0.724  | 0.745    | 75.5%    | 0.785       |

ML models, machine learning models. *P* value < 0.05 was considered statistically significant.

**Supplementary Table S10.** The validation of the published GDM models and models established by in this study

| Author/Year                      | Variables                              | AUC (95%CI)         | <i>P</i> | Sensitivity | Specificity |
|----------------------------------|----------------------------------------|---------------------|----------|-------------|-------------|
| Published models                 |                                        |                     |          |             |             |
| Zheng 2019                       | Age, BMI, FPG, TG                      | 0.354 (0.266-0.442) | 0.092    | 0.923       | 0.023       |
| Guo 2020                         | Age, BMI, FPG, diabetes family history | 0.716 (0.625-0.806) | <0.001   | 0.102       | 1.0         |
| Zhang 2020                       | Age, BMI, HbA1c, TG                    | 0.709 (0.614-0.804) | <0.001   | 0.102       | 1.0         |
| Models established in this study |                                        |                     |          |             |             |
| Score-scaled model               | -                                      | 0.769(0.681-0.858)  | <0.001   | 53.8        | 87.8        |
| Logistic regression model        | -                                      | 0.841(0.736-0.891)  | <0.001   | 28.2        | 99.4        |
| Decision tree model              | -                                      | 0.777(0.726-0.829)  | <0.001   | 63.2        | 80.6        |
| Random forest model              | -                                      | 0.740(0.684-0.795)  | <0.001   | 65.1        | 74.8        |

## Supplementary Figure S1. Age

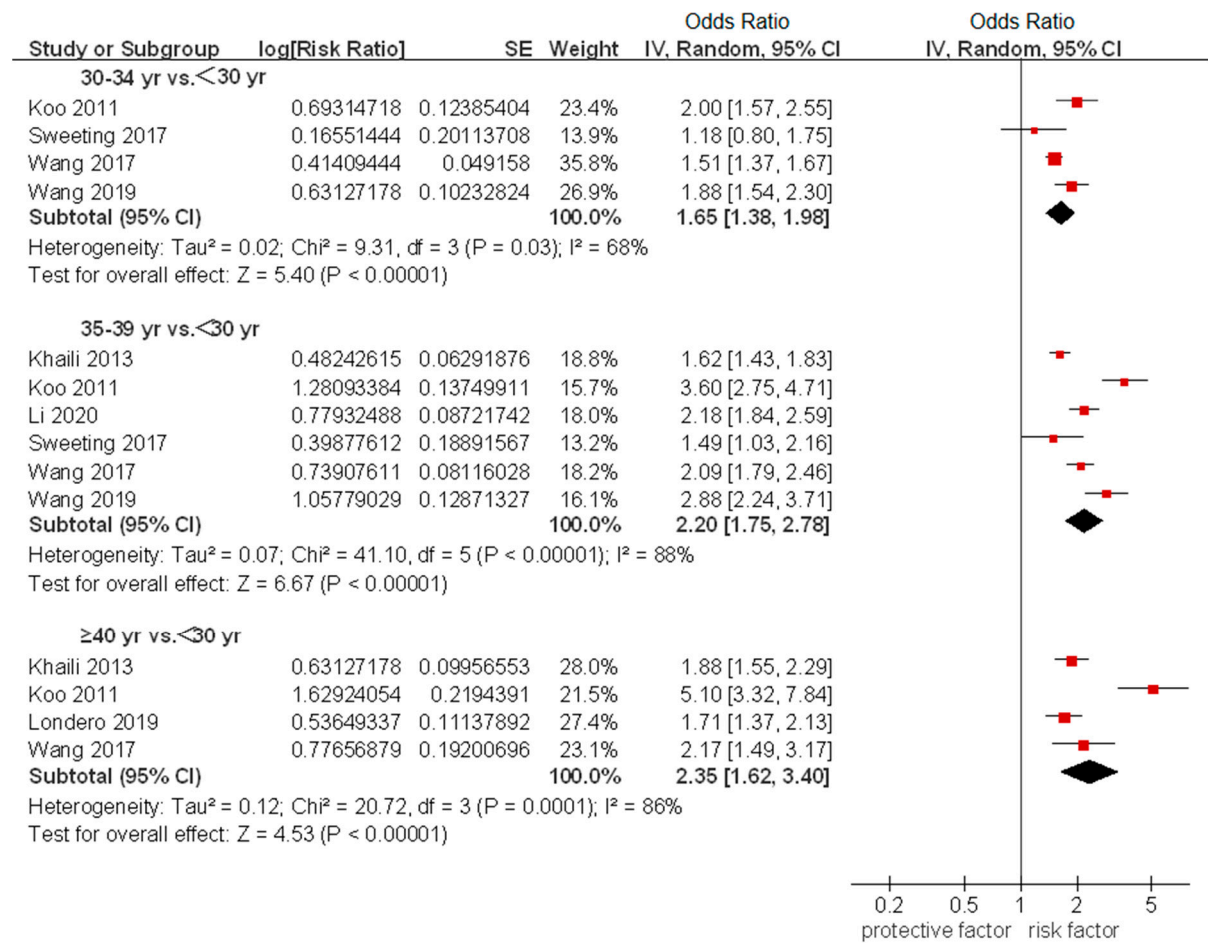

## Supplementary Figure S2. T2DM family history

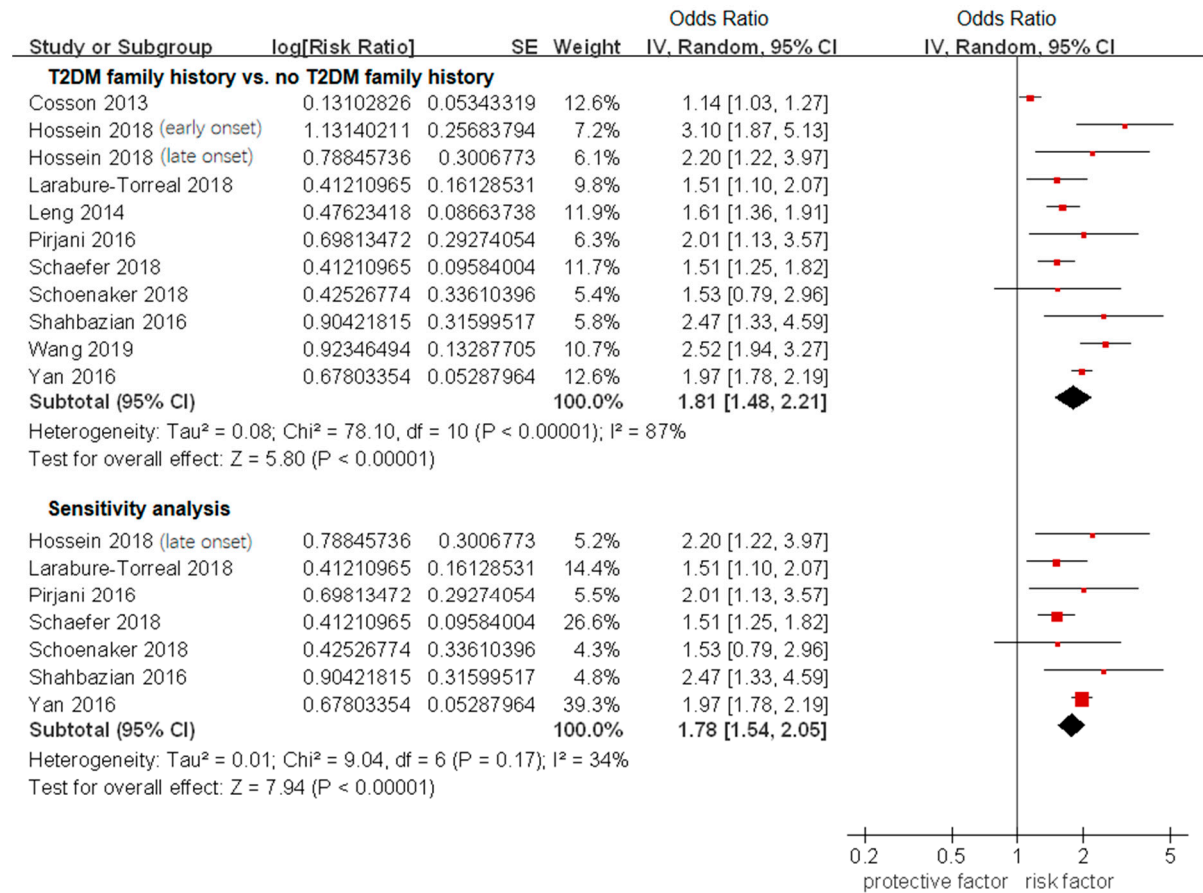

### Supplementary Figure S3. Pre-BMI overweight

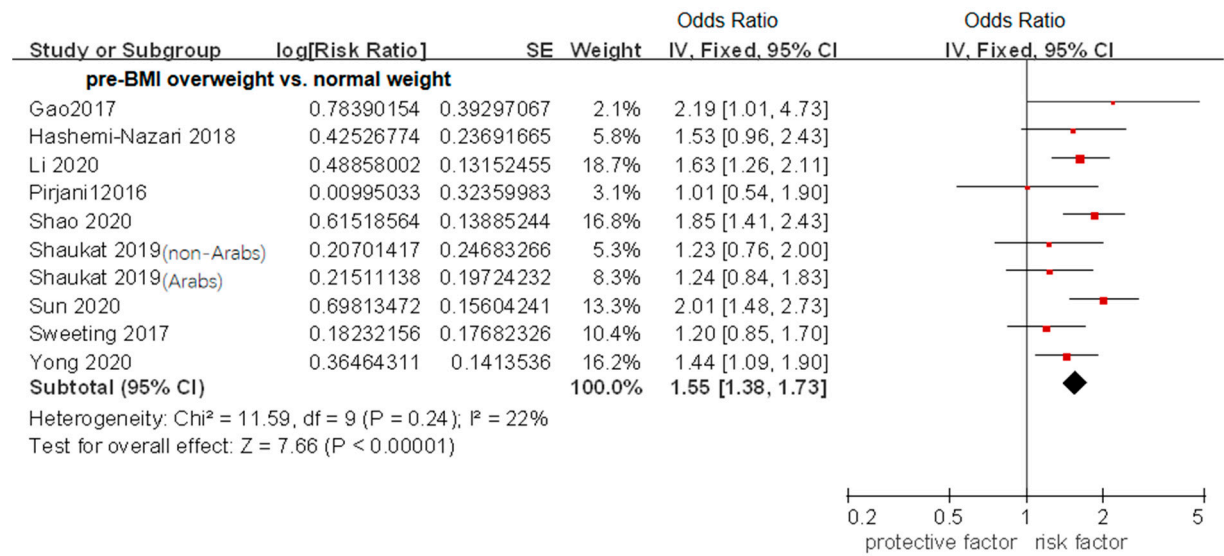

## Supplementary Figure S4. Pre-BMI obesity and sensitivity analysis

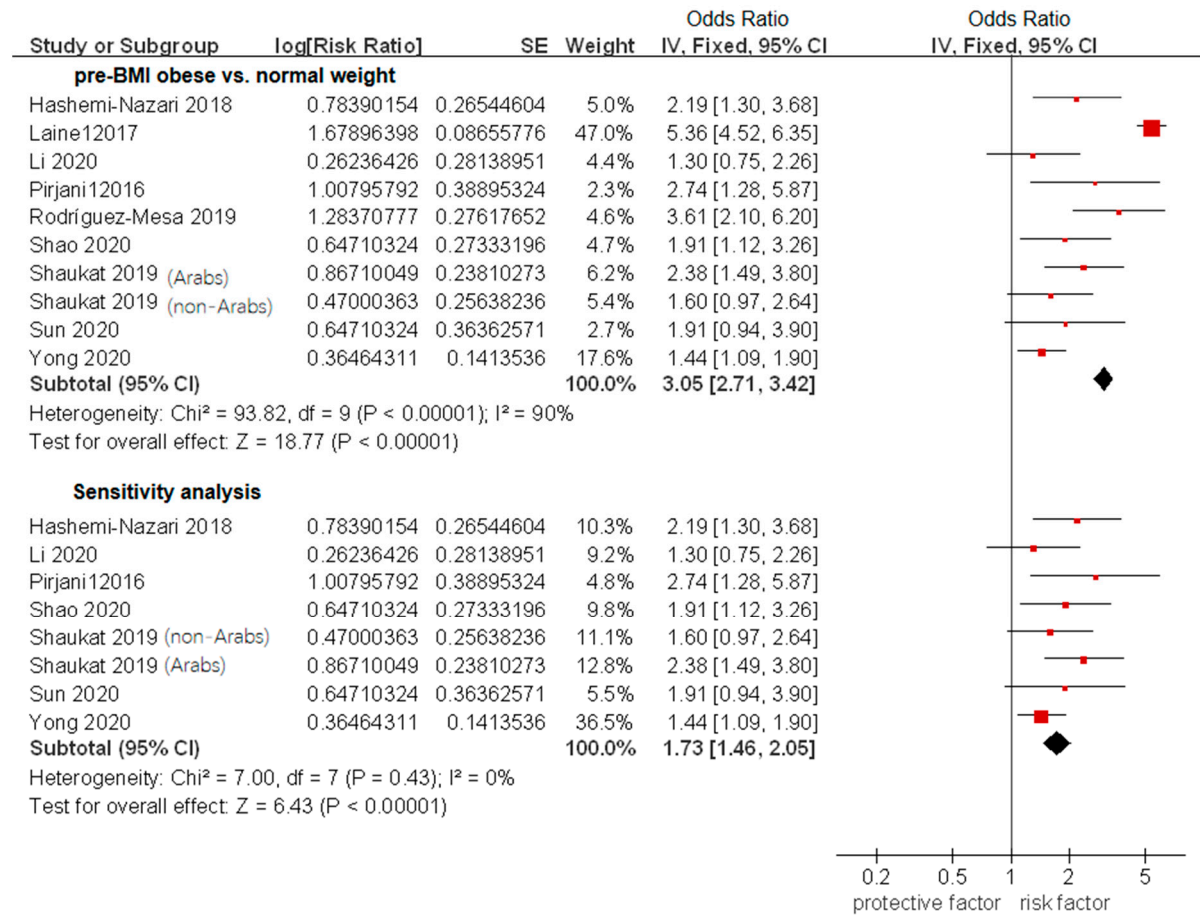

## Supplementary Figure S5. Age at menarche

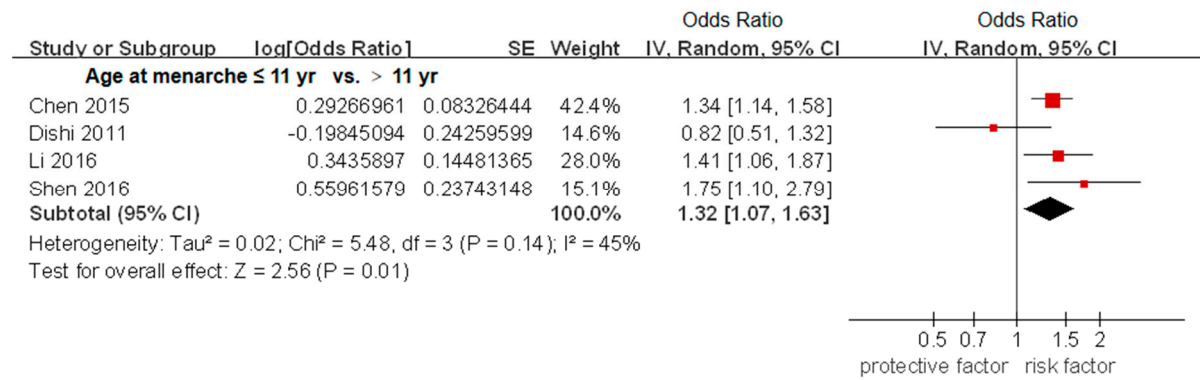

# Supplementary Figure S6. Acceptance for ART treatment

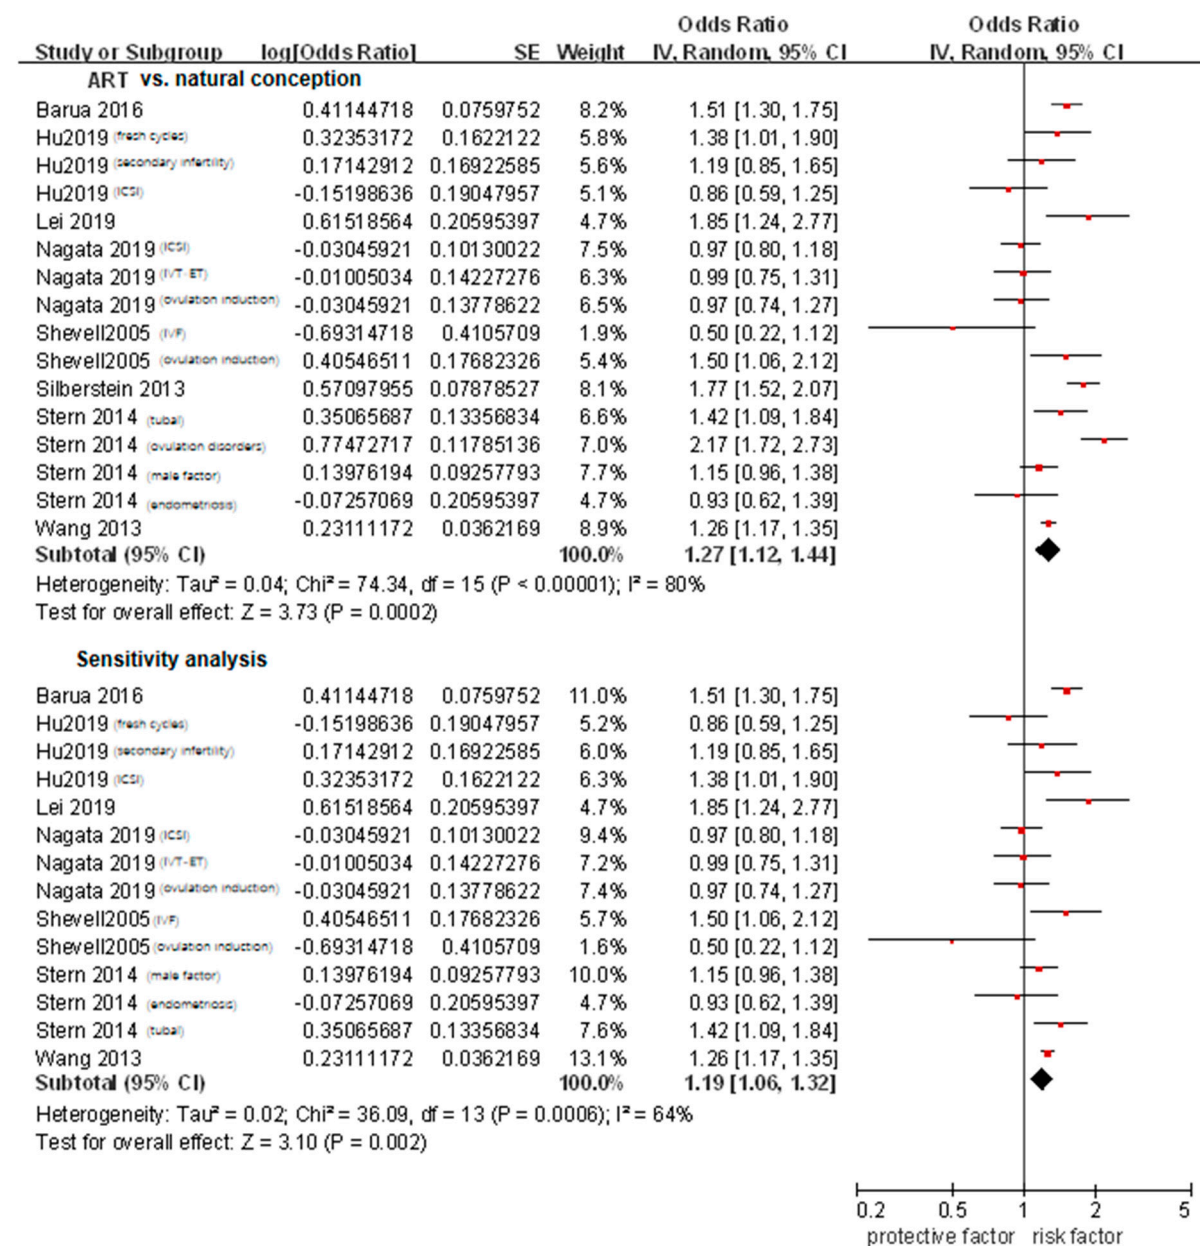



## Supplementary Figure S7. Positive status for thyroid-related antibodies

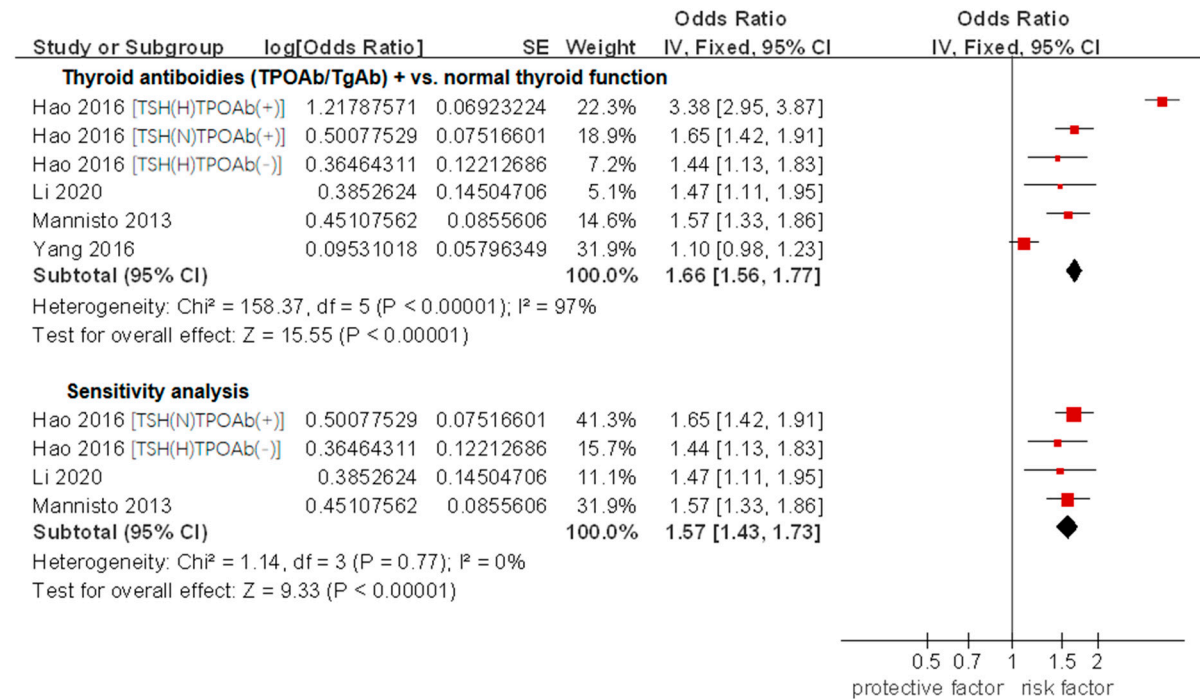

## Supplementary Figure S8. GWG at the 1<sup>st</sup> trimester

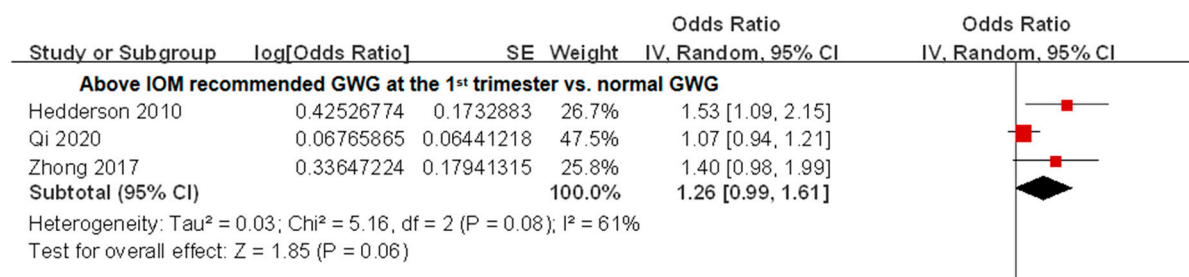

## Supplementary Figure S9. Funnel plot of the included variables in the score-scaled GDM prediction model

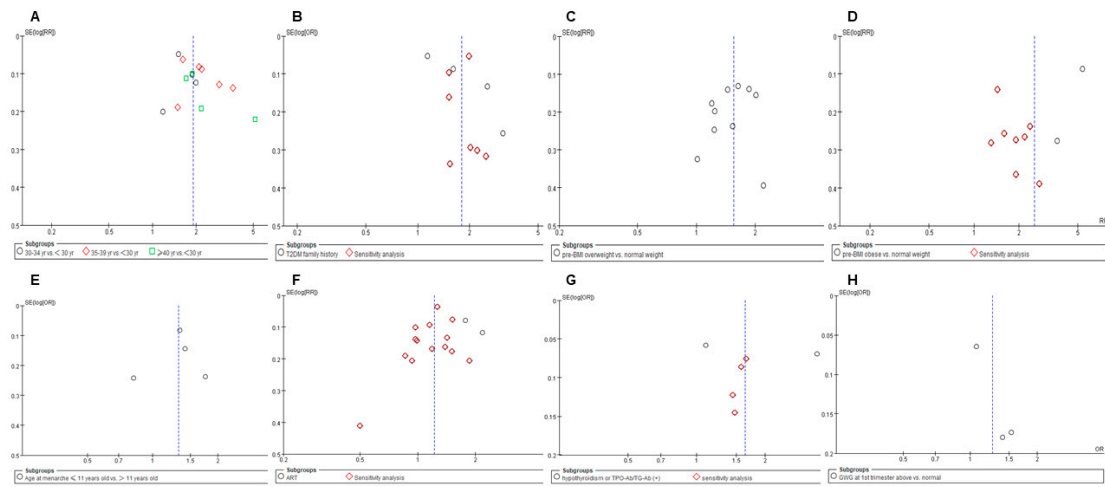

Funnel plot of age (A), T2DM family history (B), pre-BMI overweight (C), pre-BMI obese (D), age at menarche (E), accept ART treatment (F), thyroid relative antibodies positive (G), GWG at the 1st trimester (H)

**Supplementary Figure S10. The ROC curves for the two ML models**

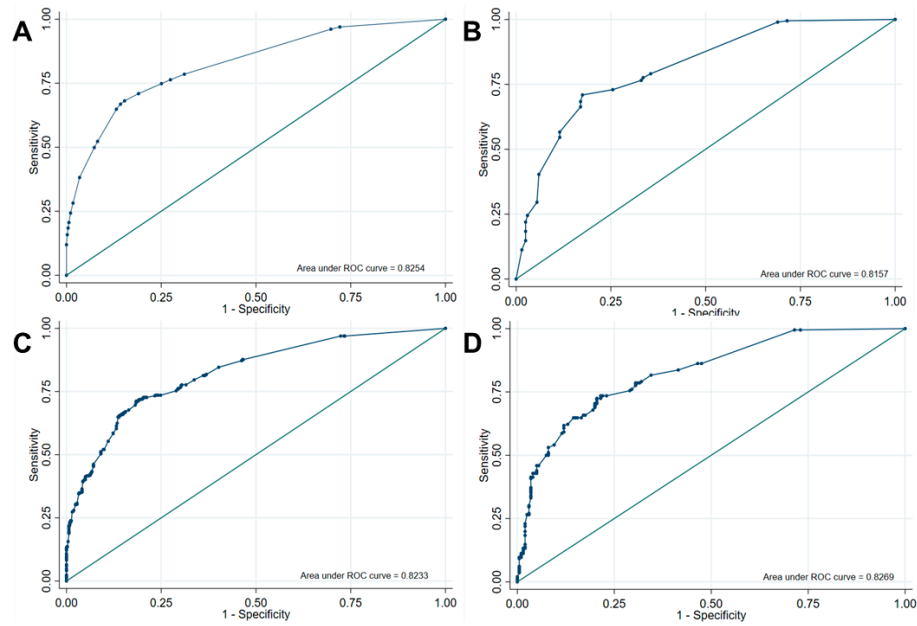

**(A)** ROC curve of the training set for the decision tree model and **(B)** the ROC curve for the validation set. **(C)** ROC curve for the training set for the random forest model, and **(D)** the ROC curve for the validation set.

**Supplementary Figure S11. The tree structure in the decision tree model**

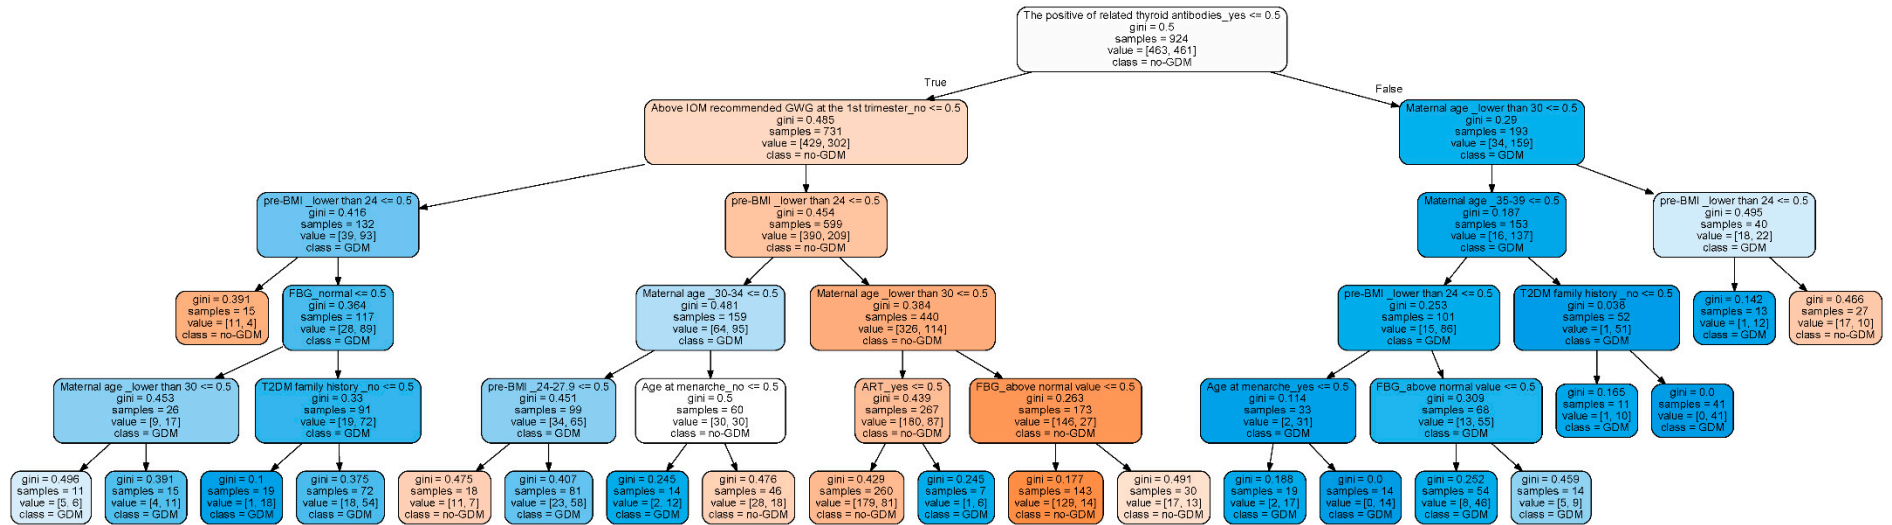

**Supplementary Figure S12. The tree structure in the random forest model**

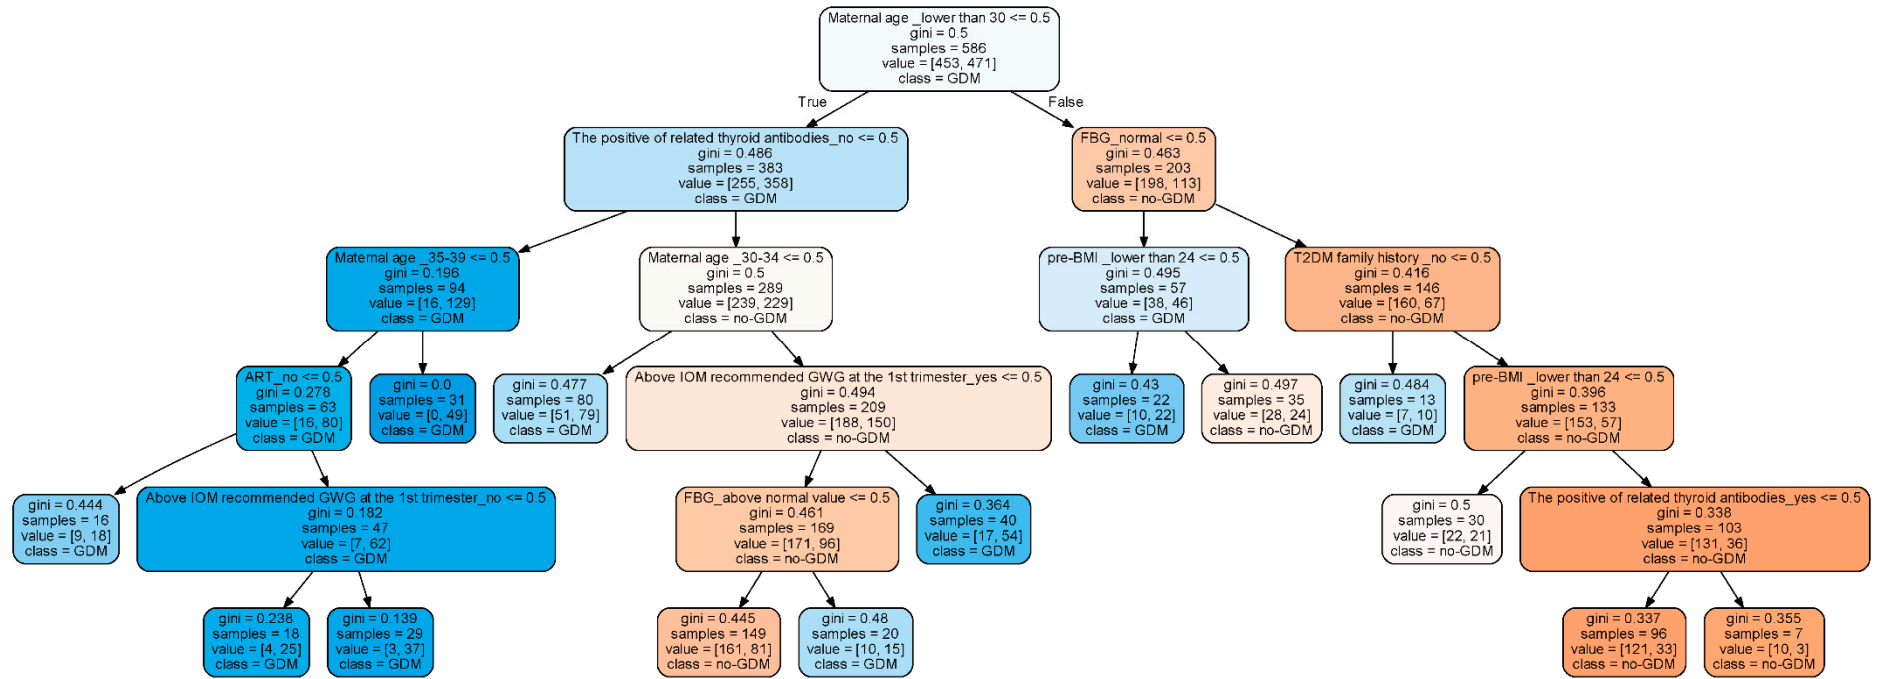

**Supplementary Figure S13. Feature importance curve derived from the decision tree and random forest models**

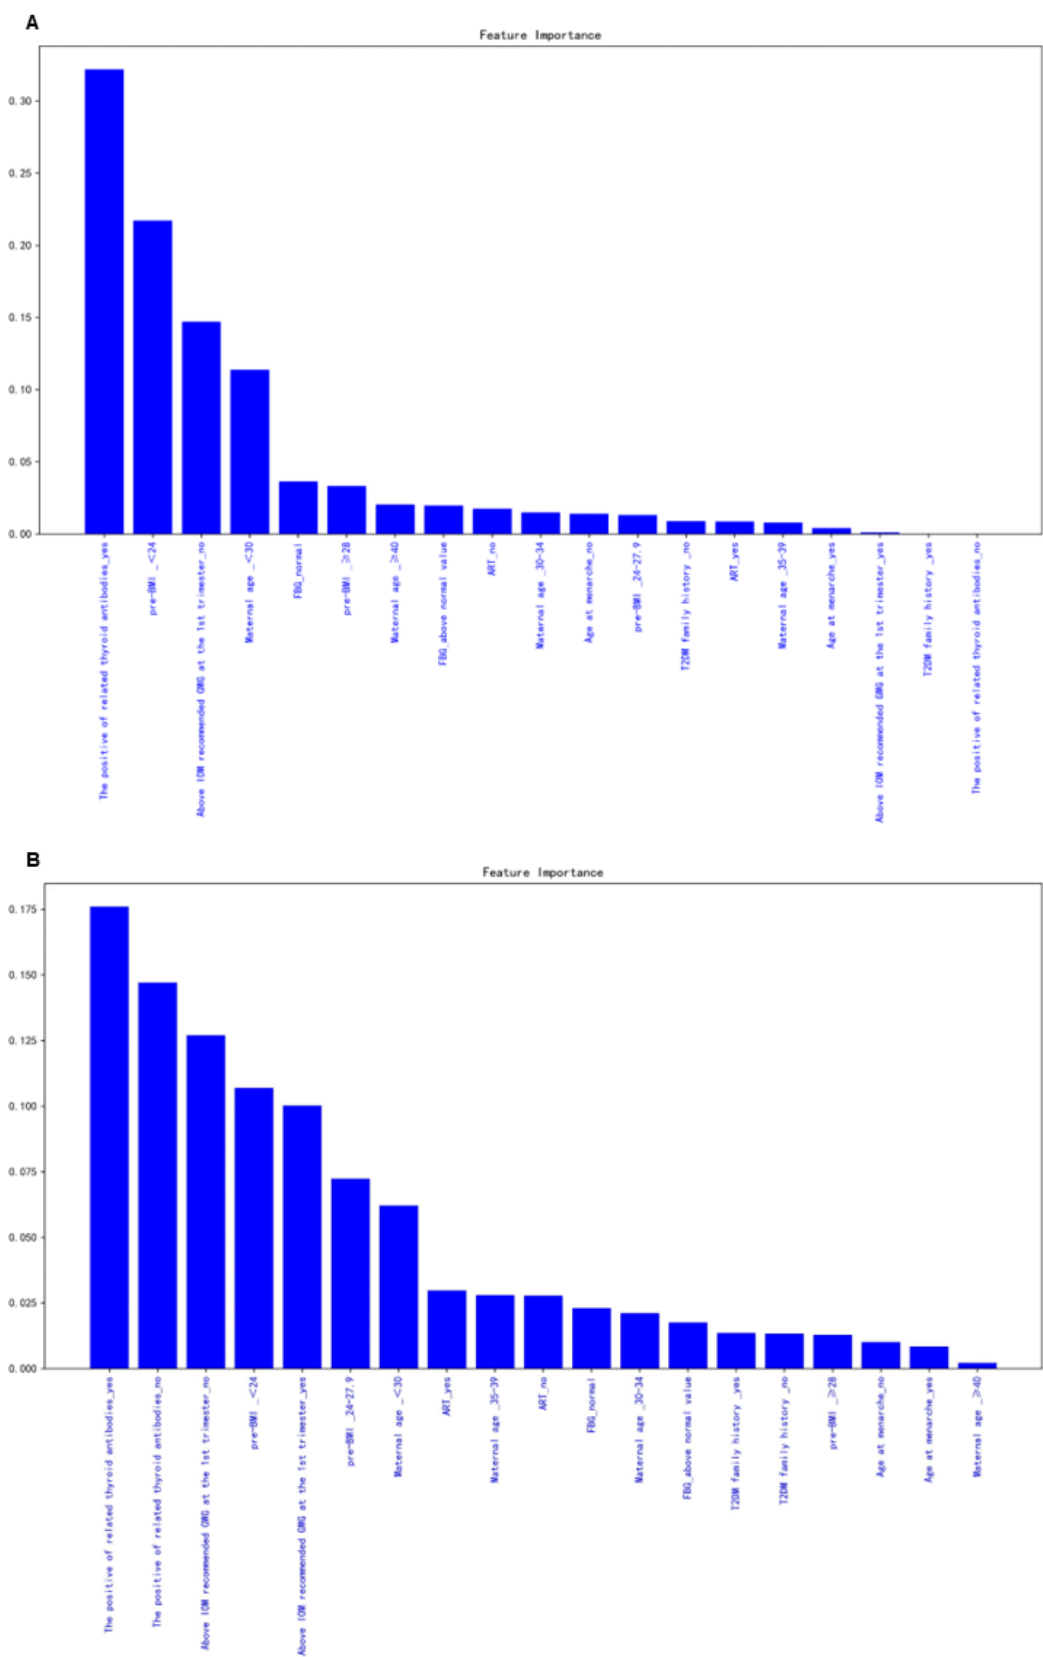

**(A)** Decision tree model. **(B)** Random forest model.

## Studies included in the meta-analysis

1. Qi, Y. N.; Sun, X.; Tan, J.; Zhang, G. T.; Chen, M.; Xiong, Y. Q.; Chen, P.; Liu, C. R.; Zou, K.; Liu, X. H., Excessive gestational weight gain in the first and second trimester is a risk factor for gestational diabetes mellitus among women pregnant with singletons: A repeated measures analysis. *J Diabetes Invest* **2020**, *11* (6), 1651-1660.
2. Hedderston, M. M.; Gunderson, E. P.; Ferrara, A., Gestational Weight Gain and Risk of Gestational Diabetes Mellitus. *Obstet Gynecol* **2010**, *115* (3), 597-604.
3. Zhong, C. R.; Li, X. T.; Chen, R. J.; Zhou, X. Z.; Liu, C. Q.; Wu, J. Y.; Xu, S. Z.; Wang, W. Y.; Xiao, M.; Xiong, G. P.; Wang, J.; Yang, X. F.; Hao, L. P.; Yang, N. H., Greater early and mid-pregnancy gestational weight gain are associated with increased risk of gestational diabetes mellitus: A prospective cohort study. *Clin Nutr Espen* **2017**, *22*, 48-53.
4. Chen, L. W.; Li, S. S.; He, C. Y.; Zhu, Y. Y.; Louis, G. M. B.; Yeung, E.; Hu, F. B.; Zhang, C. L., Age at Menarche and Risk of Gestational Diabetes Mellitus: A Prospective Cohort Study Among 27,482 Women. *Diabetes Care* **2016**, *39* (3), 469-471.
5. Dishy, M.; Enquobahrie, D. A.; Abetew, D. F.; Qiu, C. F.; Rudra, C. B.; Williams, M. A., Age at menarche, menstrual cycle characteristics and risk of gestational diabetes. *Diabetes Res Clin Pr* **2011**, *93* (3), 437-442.
6. Li, H.; Shen, L.; Song, L.; Liu, B.; Zheng, X.; Xu, S.; Wang, Y., Early age at menarche and gestational diabetes mellitus risk: Results from the Healthy Baby Cohort study. *Diabetes Metab* **2017**, *43* (3), 248-252.
7. Shen, Y.; Hu, H.; Taylor, B. D.; Kan, H. D.; Xu, X. H., Early Menarche and Gestational Diabetes Mellitus at First Live Birth. *Matern Child Hlth J* **2017**, *21* (3), 593-598.
8. Ying, H.; Tang, Y. P.; Bao, Y. R.; Su, X. J.; Cai, X.; Li, Y. H.; Wang, D. F., Maternal TSH level and TPOAb status in early pregnancy and their relationship to the risk of gestational diabetes mellitus. *Endocrine* **2016**, *54* (3), 742-750.
9. Li, G. J.; Wei, T.; Ni, W.; Zhang, A.; Zhang, J.; Xing, Y. H.; Xing, Q. S., Incidence and Risk Factors of Gestational Diabetes Mellitus: A Prospective Cohort Study in Qingdao, China. *Front Endocrinol* **2020**, *11*.
10. Mannisto, T.; Mendola, P.; Grewal, J.; Xie, Y. L.; Chen, Z.; Laughon, S. K., Thyroid Diseases and Adverse Pregnancy Outcomes in a Contemporary US Cohort. *J Clin Endocr Metab* **2013**, *98* (7), 2725-2733.
11. Yang, S.; Shi, F. T.; Leung, P. C. K.; Huang, H. F.; Fan, J. X., Low Thyroid Hormone in Early Pregnancy Is Associated With an Increased Risk of Gestational Diabetes Mellitus. *J Clin Endocr Metab* **2016**, *101* (11), 4237-4243.
12. Lei, L. L.; Lan, Y. L.; Wang, S. Y.; Feng, W.; Zhai, Z. J., Perinatal complications and live-birth outcomes following assisted reproductive technology: a retrospective cohort study. *Chinese Med J-Peking* **2019**, *132* (20), 2408-2416.
13. Barua, S.; Hng, T. M.; Smith, H.; Bradford, J.; McLean, M., Ovulatory disorders are an independent risk factor for pregnancy complications in women receiving assisted reproduction treatments. *Aust Nz J Obstet Gyn* **2017**, *57* (3), 286-293.
14. Hu, S. Q.; Xu, B.; Zhang, Y. N.; Jin, L., Risk factors of gestational diabetes mellitus during assisted reproductive technology procedures. *Gynecol Endocrinol* **2020**, *36* (4), 318-321.
15. Nagata, C.; Yang, L. M.; Yamamoto-Hanada, K.; Mezawa, H.; Ayabe, T.; Ishizuka, K.; Konishi, M.; Ohya, Y.; Saito, H.; Sago, H.; Kawamoto, T.; Kishi, R.; Yaegashi, N.



- Hashimoto, K.; Mori, C.; Ito, S.; Yamagata, Z.; Inadera, H.; Kamijima, M.; Nakayama, T.; Iso, H.; Shima, M.; Hirooka, Y.; Suganuma, N.; Kusuhara, K.; Katoh, T.; Study, J. E. C., Complications and adverse outcomes in pregnancy and childbirth among women who conceived by assisted reproductive technologies: a nationwide birth cohort study of Japan environment and children's study. *Bmc Pregnancy Childb* **2019**, *19*.
16. Shevell, T.; Malone, F. D.; Vidaver, J.; Porter, T. F.; Luthy, D. A.; Comstock, C. H.; Hankins, G. D.; Eddleman, K.; Dolan, S.; Dugoff, L.; Craigo, S. D.; Timor, I. E.; Carr, S. R.; Wolfe, H. M.; D'Alton, M. E., Assisted reproductive technology and pregnancy outcome - A population based screening study (the FASTER trial). *Am J Obstet Gynecol* **2003**, *189* (6), S175-S175.
17. Silberstein, T.; Levy, A.; Harlev, A.; Saphier, O.; Sheiner, E., Perinatal outcome of pregnancies following in vitro fertilization and ovulation induction. *J Matern-Fetal Neo M* **2014**, *27* (13), 1316-1319.
18. Stern, J. E.; Luke, B.; Tobias, M.; Gopal, D.; Hornstein, M. D.; Diop, H., Adverse pregnancy and birth outcomes associated with underlying diagnosis with and without assisted reproductive technology treatment. *Fertil Steril* **2015**, *103* (6), 1438-1445.
19. Wang, Y. A.; Nikravan, R.; Smith, H. C.; Sullivan, E. A., Higher prevalence of gestational diabetes mellitus following assisted reproduction technology treatment. *Hum Reprod* **2013**, *28* (9), 2554-2561.
20. Cosson, E.; Cussac-Pillegand, C.; Benbara, A.; Pharisien, I.; Jaber, Y.; Banu, I.; Nguyen, M. T.; Valensi, P.; Carbillon, L., The Diagnostic and Prognostic Performance of a Selective Screening Strategy for Gestational Diabetes Mellitus According to Ethnicity in Europe. *J Clin Endocr Metab* **2014**, *99* (3), 996-1005.
21. Schoenaker, D. A. J. M.; Vergouwe, Y.; Soedamah-Muthu, S. S.; Callaway, L. K.; Mishra, G. D., Preconception risk of gestational diabetes: Development of a prediction model in nulliparous Australian women. *Diabetes Res Clin Pr* **2018**, *146*, 48-57.
22. Hosseini, E.; Janghorbani, M.; Shahshahan, Z., Comparison of risk factors and pregnancy outcomes of gestational diabetes mellitus diagnosed during early and late pregnancy. *Midwifery* **2018**, *66*, 64-69.
23. Larrabure-Torrealva, G. T.; Martinez, S.; Luque-Fernandez, M. A.; Sanchez, S. E.; Mascaro, P. A.; Ingar, H.; Castillo, W.; Zumaeta, R.; Grande, M.; Motta, V.; Pacora, P.; Gelaye, B.; Williams, M. A., Prevalence and risk factors of gestational diabetes mellitus: findings from a universal screening feasibility program in Lima, Peru. *Bmc Pregnancy Childb* **2018**, *18*.
24. Leng, J. H.; Shao, P.; Zhang, C. P.; Tian, H. G.; Zhang, F. X.; Zhang, S.; Dong, L.; Li, L. L.; Yu, Z. J.; Chan, J. C. N.; Hu, G.; Yang, X. L., Prevalence of Gestational Diabetes Mellitus and Its Risk Factors in Chinese Pregnant Women: A Prospective Population-Based Study in Tianjin, China. *Plos One* **2015**, *10* (3).
25. Pirjani, R.; Shirzad, N.; Qorbani, M.; Phelpeli, M.; Nasli-Esfahani, E.; Bandarian, F.; Hemmatabadi, M., Gestational diabetes mellitus its association with obesity: a prospective cohort study. *Eat Weight Disord-St* **2017**, *22* (3), 445-450.
26. Schaefer, K. K.; Xiao, W. Q.; Chen, Q. Z.; He, J. R.; Lu, J. H.; Chan, F. F.; Chen, N. N.; Yuan, M. Y.; Xia, H. M.; Lam, K. B. H.; Hirst, J. E.; Qiu, X., Prediction of gestational diabetes mellitus in the Born in Guangzhou Cohort Study, China. *Int J Gynecol Obstet* **2018**, *143* (2), 164-171.

27. Shahbazian, H.; Nouhjah, S.; Shahbazian, N.; Jahanfar, S.; Latifi, S. M.; Aleali, A.; Shahbazian, N.; Saadati, N., Gestational diabetes mellitus in an Iranian pregnant population using IADPSG criteria: Incidence, contributing factors and outcomes. *Diabetes Metab Syndr* **2016**, *10*(4), 242-246.
28. Wang, Y.; Luo, B., Risk factors analysis of gestational diabetes mellitus based on International Association of Diabetes Pregnancy Study Groups criteria. *Nan fang yi ke da xue xue bao = Journal of Southern Medical University* **2019**, *39*(5), 572-578.
29. Yan, B.; Yu, Y. X.; Lin, M. Z.; Li, Z. B.; Wang, L. Y.; Huang, P. Y.; Song, H. Q.; Shi, X. L.; Yang, S. Y.; Li, X. Y.; Li, X. J., High, but stable, trend in the prevalence of gestational diabetes mellitus: A population-based study in Xiamen, China. *J Diabetes Invest* **2019**, *10*(5), 1358-1364.
30. Khalil, A.; Syngelaki, A.; Maiz, N.; Zinevich, Y.; Nicolaides, K. H., Maternal Age and Adverse Pregnancy Outcomes: A Cohort Study EDITORIAL COMMENT. *Obstet Gynecol Surv* **2013**, *68*(12), 779-781.
31. Londero, A. P.; Rossetti, E.; Pittini, C.; Cagnacci, A.; Driul, L., Maternal age and the risk of adverse pregnancy outcomes: a retrospective cohort study. *Bmc Pregnancy Childb* **2019**, *19*.
32. Sweeting, A. N.; Appelblom, H.; Ross, G. P.; Wong, J.; Kouru, H.; Williams, P. F.; Sairanen, M.; Hyett, J. A., First trimester prediction of gestational diabetes mellitus: A clinical model based on maternal demographic parameters. *Diabetes Res Clin Pr* **2017**, *127*, 44-50.
33. Wang, C.; Wang, X. Y.; Yang, H. X., Effect of maternal age on pregnancy outcomes in Beijing. *Zhonghua fu chan ke za zhi* **2017**, *52*(8), 514-520.
34. Koo, Y. J.; Ryu, H. M.; Yang, J. H.; Lim, J. H.; Lee, J. E.; Kim, M. Y.; Chung, J. H., Pregnancy outcomes according to increasing maternal age. *Taiwan J Obstet Gyne* **2012**, *51*(1), 60-65.
35. Sun, Y.; Shen, Z. Z.; Zhan, Y. L.; Wang, Y. W.; Ma, S.; Zhang, S. H.; Liu, J. T.; Wu, S. S.; Feng, Y. H.; Chen, Y. L.; Cai, S. Y.; Shi, Y. J.; Ma, L. K.; Jiang, Y., Effects of pre-pregnancy body mass index and gestational weight gain on maternal and infant complications. *Bmc Pregnancy Childb* **2020**, *20*(1).
36. Rodriguez-Mesa, N.; Robles-Benayas, P.; Rodriguez-Lopez, Y.; Perez-Fernandez, E. M.; Cobo-Cuenca, A. I., Influence of Body Mass Index on Gestation and Delivery in Nulliparous Women: A Cohort Study. *Int J Env Res Pub He* **2019**, *16*(11).
37. Shaukat, S.; Nur, U., Effect of prepregnancy maternal BMI on adverse pregnancy and neonatal outcomes: results from a retrospective cohort study of a multiethnic population in Qatar. *Bmj Open* **2019**, *9*(9).
38. Gao, X. A.; Yan, Y.; Xiang, S. T.; Zeng, G. Y.; Liu, S. P.; Sha, T. T.; He, Q. O.; Li, H. Y.; Tan, S.; Chen, C.; Li, L.; Yan, Q. A., The mutual effect of pre-pregnancy body mass index, waist circumference and gestational weight gain on obesity-related adverse pregnancy outcomes: A birth cohort study. *Plos One* **2017**, *12*(6).
39. Laine, M. K.; Kautiainen, H.; Gissler, M.; Raina, M.; Aahos, I.; Jarvinen, K.; Pennanen, P.; Eriksson, J. G., Gestational diabetes in primiparous women-impact of age and adiposity: a register-based cohort study. *Acta Obstet Gyn Scan* **2018**, *97*(2), 187-194.
40. Yong, H. Y.; Shariff, Z. M.; Yusof, B. N. M.; Rejali, Z.; Tee, Y. Y. S.; Bindels, J.; van Der Beek, E. M., Independent and combined effects of age, body mass index and gestational weight gain on the risk of gestational diabetes mellitus. *Sci Rep-Uk* **2020**, *10*(1).
41. Hashemi-Nazari, S. S.; Najafi, F.; Rahimi, M. A.; Izadi, N.; Heydarpour, F.; Forooghira,

H., Estimation of gestational diabetes mellitus and dose-response association of BMI with the occurrence of diabetes mellitus in pregnant women of the west of Iran. *Health Care Women In* **2020**, *41* (1), 121-130.

42. Shao, B. L.; Mo, M. J.; Xin, X.; Jiang, W.; Wu, J. H.; Huang, M. X.; Wang, S. J.; Muyiduli, X.; Si, S. T.; Shen, Y.; Chen, Z. X.; Yu, Y. X., The interaction between prepregnancy BMI and gestational vitamin D deficiency on the risk of gestational diabetes mellitus subtypes with elevated fasting blood glucose. *Clin Nutr* **2020**, *39* (7), 2265-2273.
